# Supplementary material
Source: publisher site journal article supplement (https://www.spandidos-publications.com/902/downloadSupplementary)

Figure S1. Boxplot of the normalization and base-2 logarithm conversion for the group containing three datasets, GSE76250, GSE86945 and GSE86946.

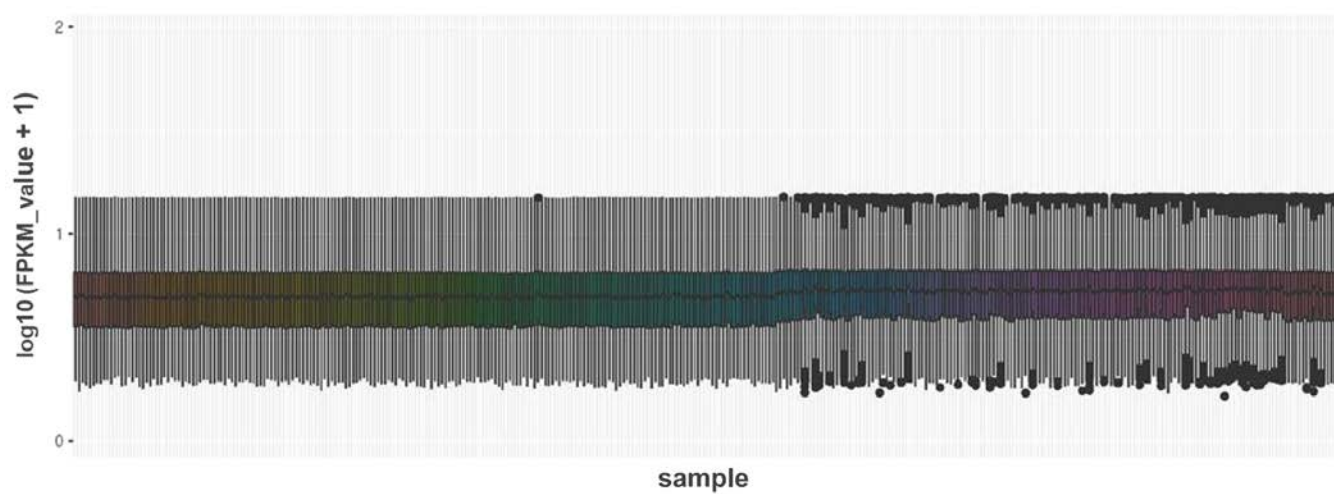

Figure S2. Heatmaps of the top 200 differentially expressed long non-coding RNAs identified from the The Cancer Genome Atlas database.

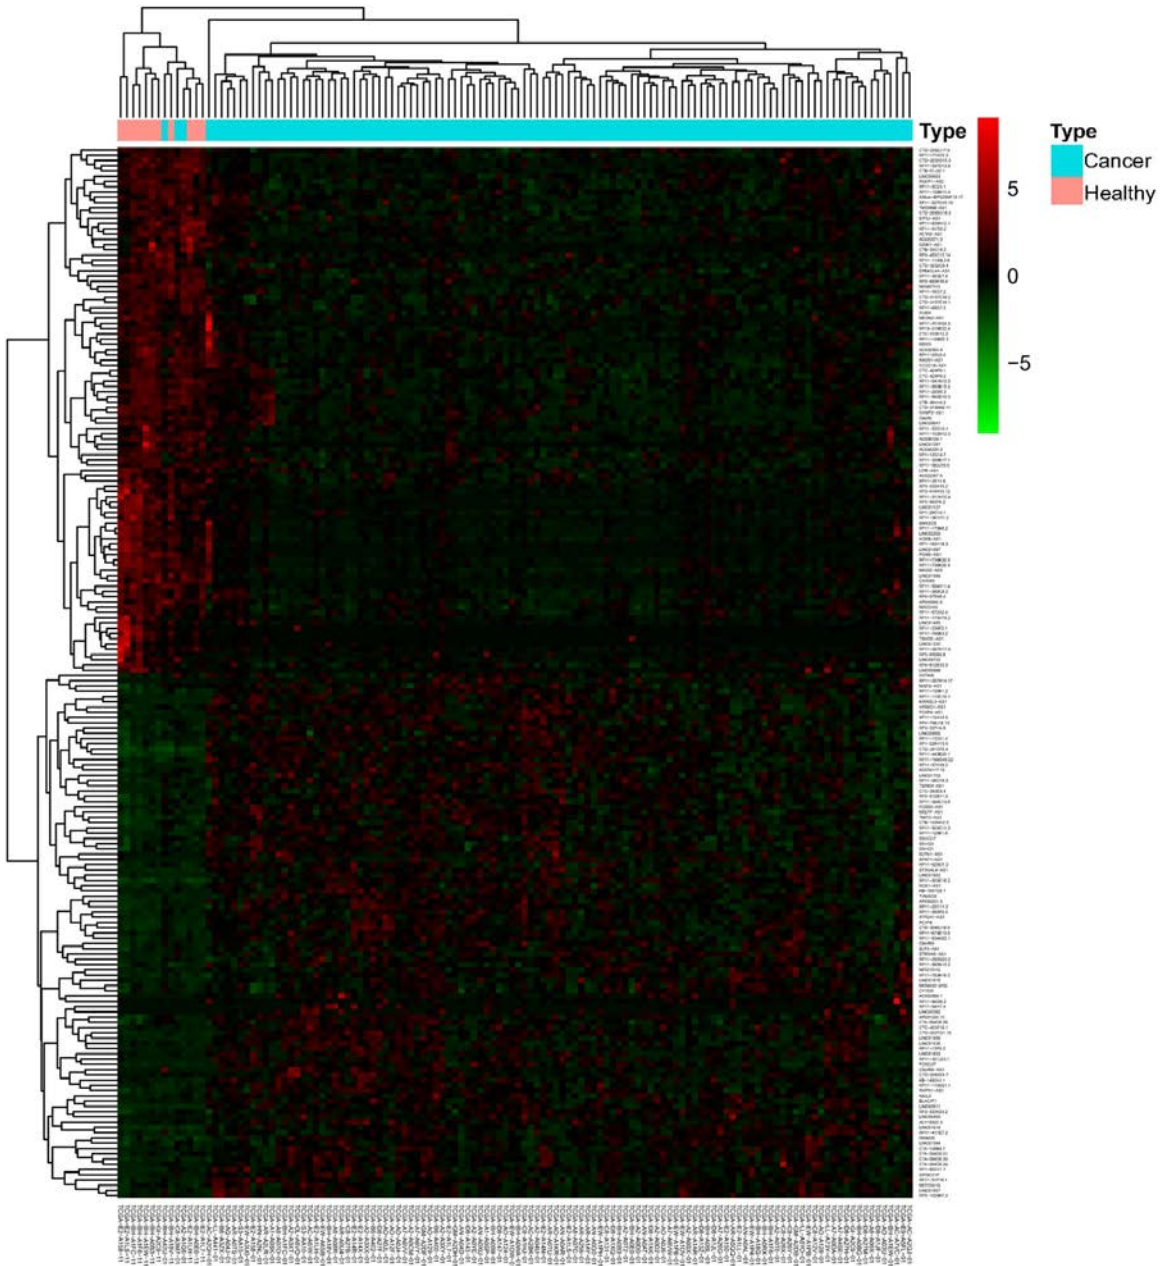

Figure S3. Heatmaps of the top 200 differentially expressed mRNAs identified from the The Cancer Genome Atlas database.

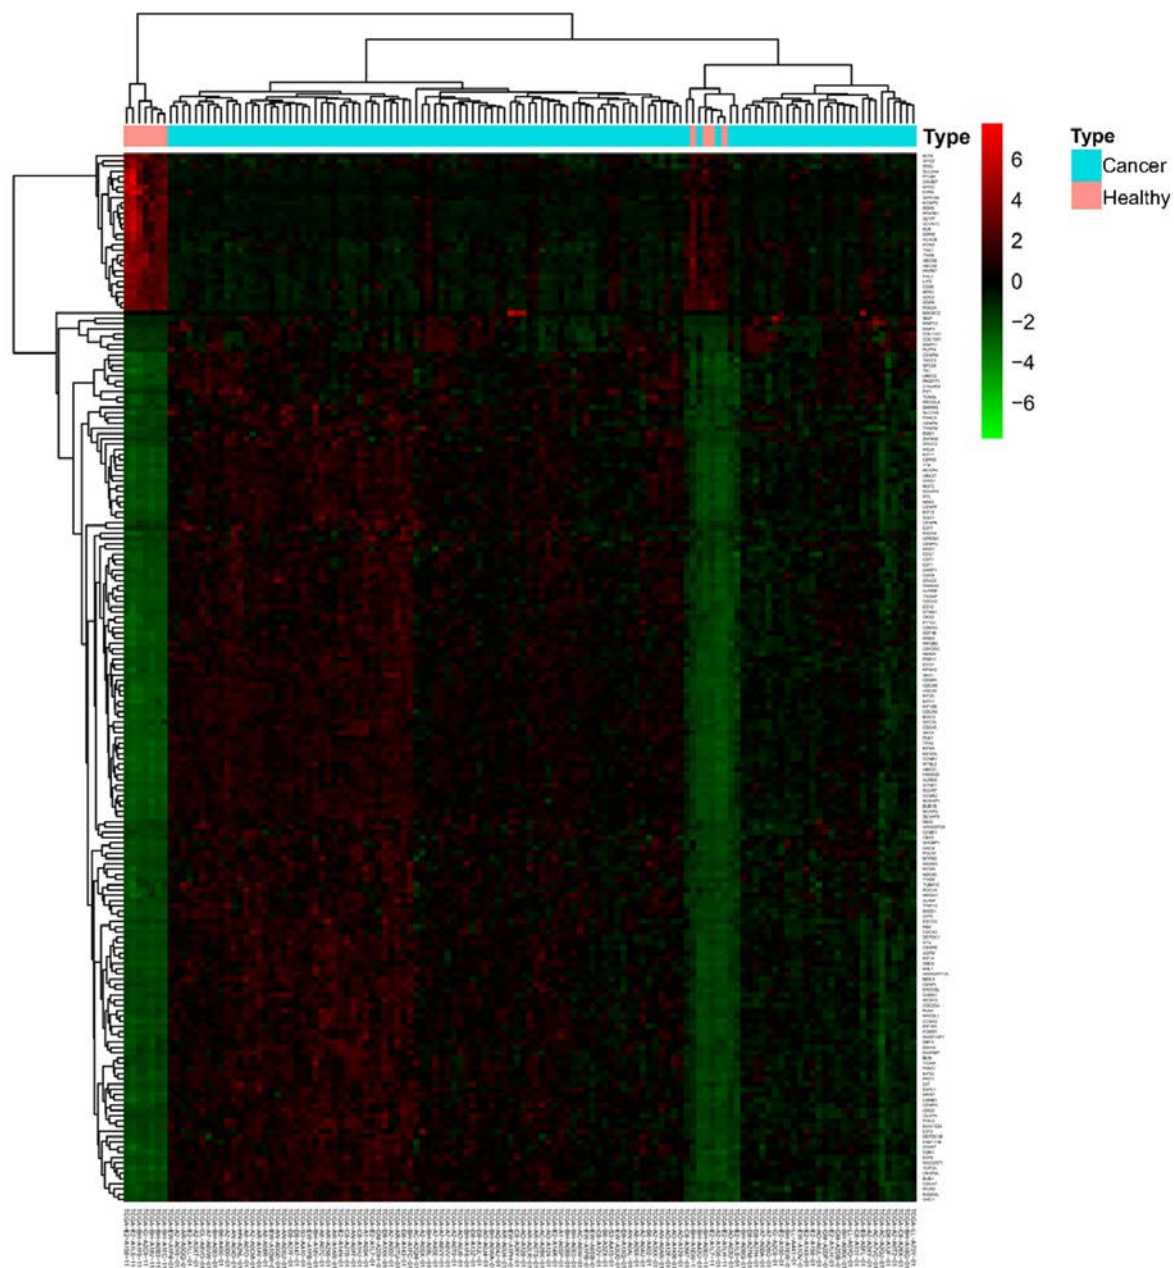

Supplement: Supplementary file 1 [file downloadSupplementary]
